# Supplementary material for: BF3-promoted electrochemical properties of quinoxaline in propylene carbonate
Source: Royal Society of Chemistry journal article supplement (doi:10.1039/c5ra00137d), 2015-01-01

Supporting Information

# BF<sub>3</sub>-Promoted Electrochemical Properties of Quinoxaline in Propylene Carbonate

Emily V. Carino<sup>1,2</sup>, Charles E. Diesendruck<sup>1,3,†</sup>, Jeffrey S. Moore<sup>1,3</sup>, Larry A. Curtiss<sup>1,4</sup>, Rajeev S. Assary<sup>1,4,\*</sup>, Fikile R. Brushett<sup>1,2,\*</sup>

<sup>1</sup> Joint Center for Energy Storage Research

<sup>2</sup> Department of Chemical Engineering, Massachusetts Institute of Technology, Cambridge, MA 02139

<sup>3</sup> Department of Chemistry, University of Illinois at Urbana Champaign, Urbana, IL 61801

<sup>4</sup> Materials Science Division, Argonne National Laboratory, Argonne, IL 60439

Keywords: *non-aqueous redox flow battery, quinoxaline, electrochemistry, Lewis acid, density functional theory*

† Current address: Schulich Faculty of Chemistry, Technion - Israel Institute of Technology, Technion city, Haifa, 320008, Israel

\* Corresponding authors: RSA ([assary@anl.gov](mailto:assary@anl.gov)), Phone: 001-630-252-3536, FRB ([brushett@mit.edu](mailto:brushett@mit.edu)), Phone: 001-617-324-7400

**Table S1.** Computed first and second redox potentials (V vs. Li/Li<sup>+</sup>) of quinoxaline in the presence of various solvents. In the first strategy redox potentials were computed by optimizing the redox active molecules in the implicit solvent molecule. In the second strategy, optimization in the gas phase followed by a single point energy evaluation is performed.

| <b>Solvent</b>                               | <b><math>E^V_{redox}</math> (V vs. Li/Li<sup>+</sup>):<br/>optimization in solvent</b> | <b><math>E^V_{redox}</math> (V vs. Li/Li<sup>+</sup>):<br/>optimization in gas phase and single<br/>point energy calculation in solvent</b> |
|----------------------------------------------|----------------------------------------------------------------------------------------|---------------------------------------------------------------------------------------------------------------------------------------------|
| water ( $\epsilon = 78.35$ )                 | 1.53, 1.01                                                                             | 1.55, 1.00                                                                                                                                  |
| dimethyl sulfoxide<br>( $\epsilon = 46.83$ ) | 1.50, 0.96                                                                             |                                                                                                                                             |
| methanol ( $\epsilon = 32.61$ )              | 1.48, 0.92                                                                             |                                                                                                                                             |
| acetone ( $\epsilon = 20.49$ )               | 1.44, 0.84                                                                             |                                                                                                                                             |
| diethyl ether ( $\epsilon =$<br>4.21)        | 1.03, 0.06                                                                             |                                                                                                                                             |
| n-hexane ( $\epsilon = 1.88$ )               | 0.43, -0.01                                                                            |                                                                                                                                             |
| no solvent ( $\epsilon = 0$ )                | -0.47                                                                                  | -0.47                                                                                                                                       |

**Figure S1.** Voltammetry for 0.05 M quinoxaline (Q) in 0.5 M LiPF<sub>6</sub> / PC and 0.5 M TEABF<sub>4</sub> / ACN in a GC/Li/Li cell at a scan rate of 20 mV/s. Both solutions were dried to < 25 ppm H<sub>2</sub>O using molecular sieves.

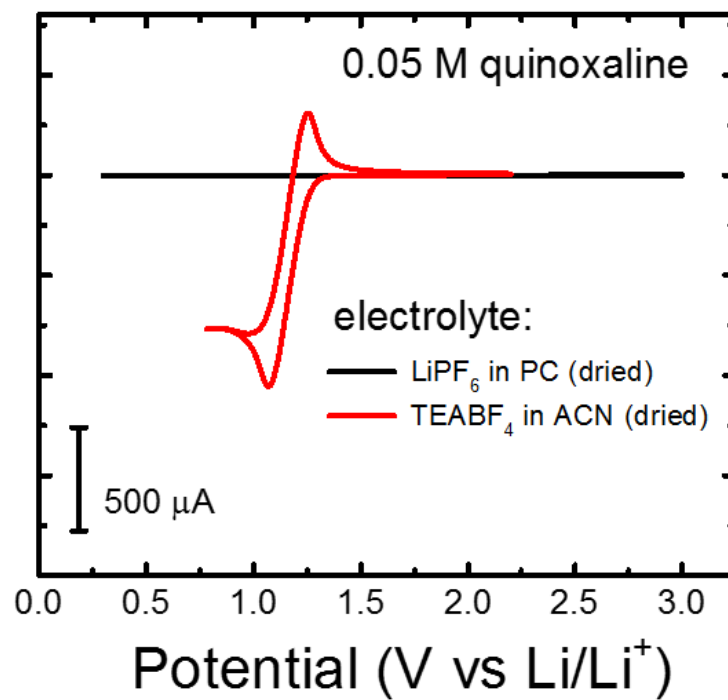

**Figure S2.** Voltammetry for 0.2 M TBABF<sub>4</sub>/PC only (black) and with 0.05 M quinoxaline (Q, red) in a GC/Li/Li cell at a scan rate of 20 mV/s.

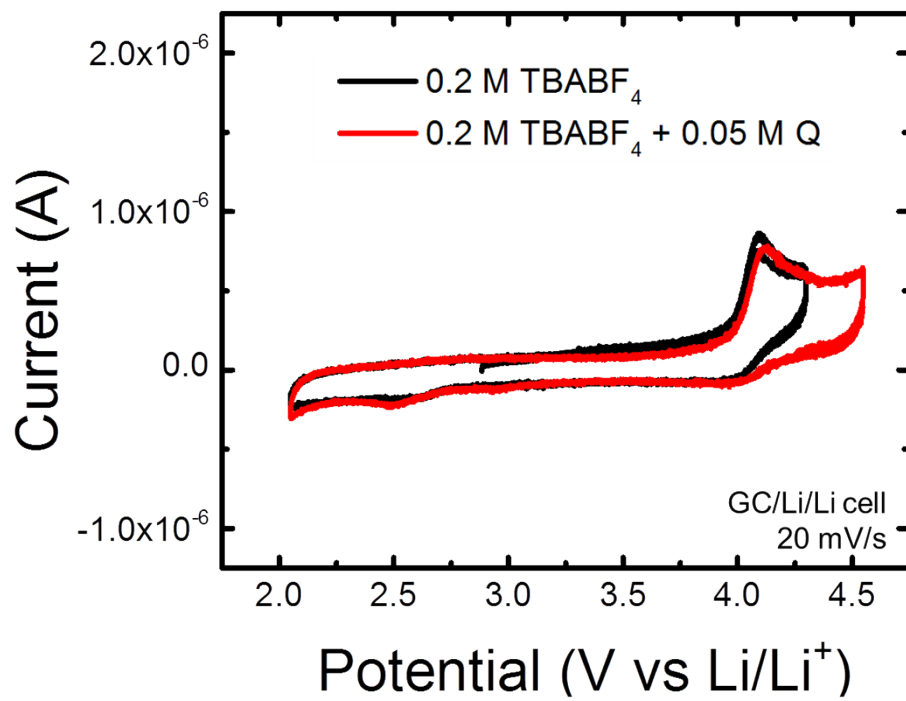

**Figure S3.** Voltammetry for 0.005 M 2,3,6-TMQ in 0.2 M LiBF<sub>4</sub> / PC on different working electrodes and Li foil counter and reference electrodes. The scan rate was 100 mV/s.

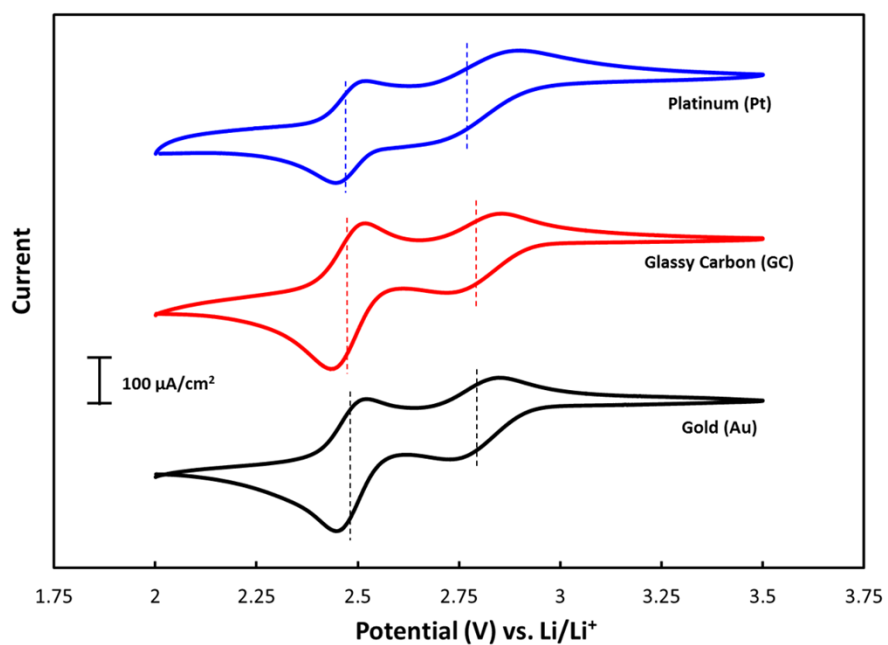

**Figure S4.** Voltammetry data corresponding to the plots in Figure 2.

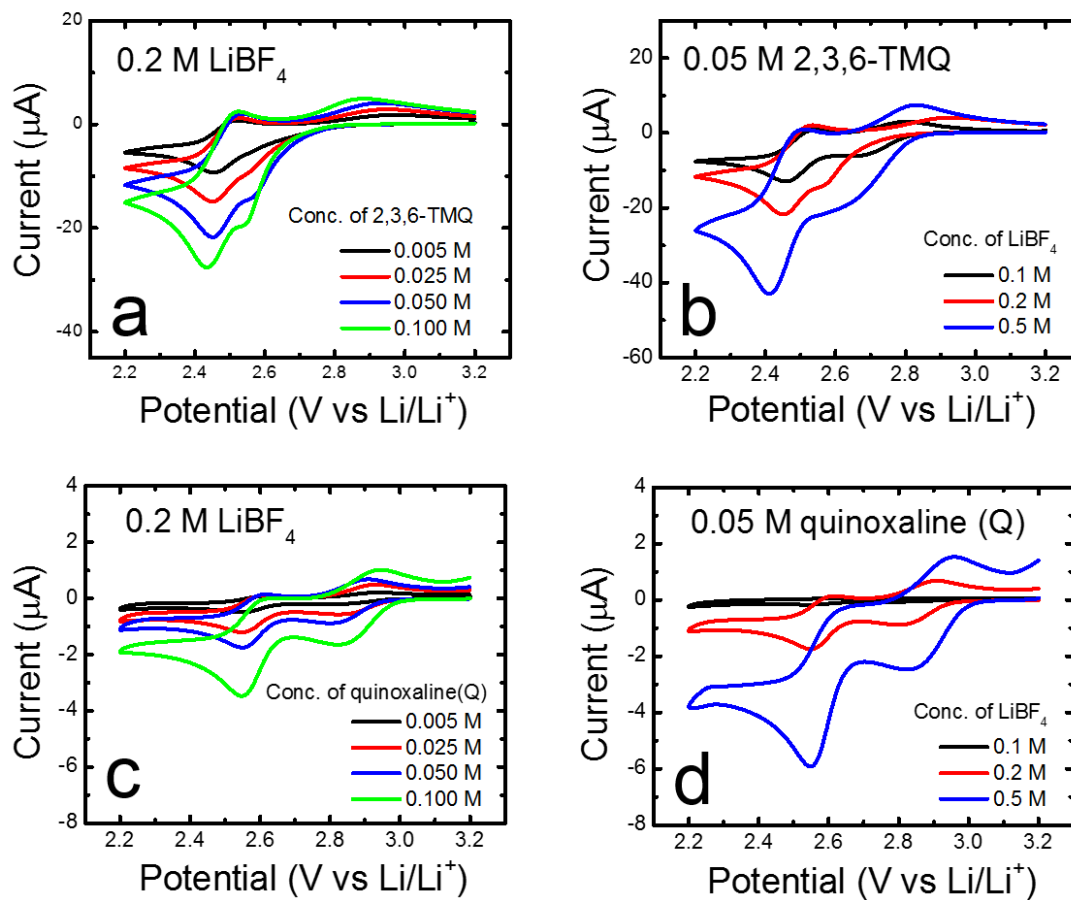

**Figure S5.** Electrochemical data for 0.2 M  $\text{BF}_3 \cdot \text{OEt}_2$  in PC only (black) and in PC with 0.05 M quinoxaline (red) in a GC/Li/Li cell at a scan rate of 20 mV/s. The solutions did not contain any additional supporting salt. The voltammogram indicated in red began at 4.3 V and the voltage was swept towards negative potentials.

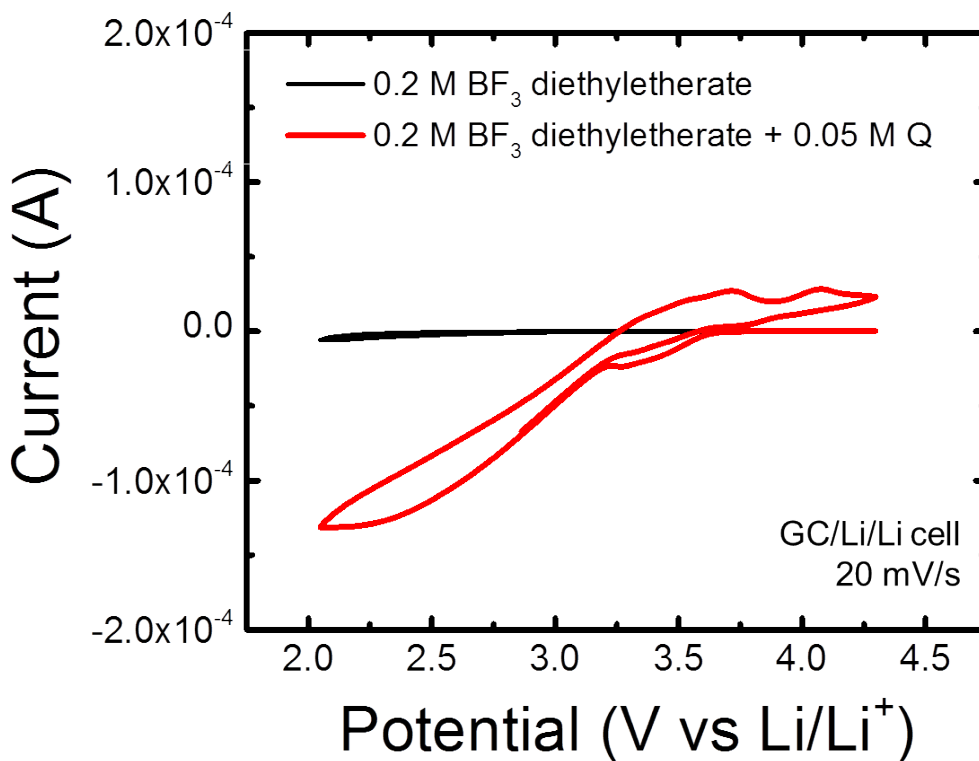

**Figure S6.** Cyclic voltammetry of dried (black line) and as-prepared (red line) solutions of quinoxaline in 0.5 M LiBF<sub>4</sub> / PC electrolyte. The data were recorded at a sweep rate of 20 mV/s using a glassy carbon working electrode, a fritted Li/Li<sup>+</sup> reference electrode, and an Au wire counter electrode.

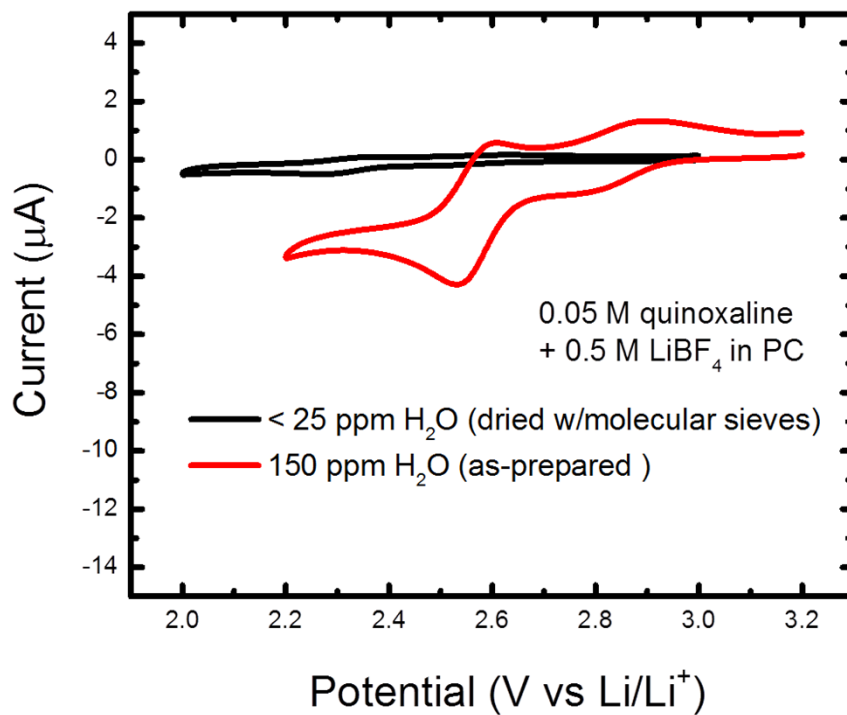



**Figure S7.** Cyclic voltammetry of 0.05 M quinoxaline in dried 0.5 M LiBF<sub>4</sub> / PC electrolyte (black line) and as-prepared 0.5 M Li triflate / PC electrolyte (red line). The data were recorded at a sweep rate of 20 mV/s using a glassy carbon working electrode, a fritted Li/Li<sup>+</sup> reference electrode, and an Au wire counter electrode.

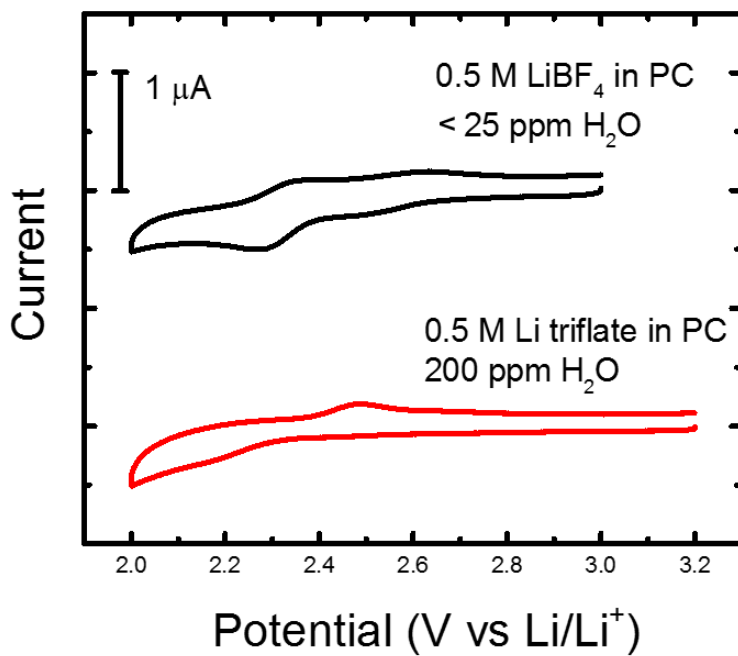

**Figure S8.** Voltammetry of quinoxaline in  $\text{LiBF}_4$  (a) and Li triflate (b) supporting electrolyte before and after adding 100  $\mu\text{L}$  of water. The starting volume, prior to water addition, was 10 mL. The data were recorded at a sweep rate of 20 mV/s using a glassy carbon working electrode, a fritted  $\text{Li}/\text{Li}^+$  reference electrode, and an Au wire counter electrode.

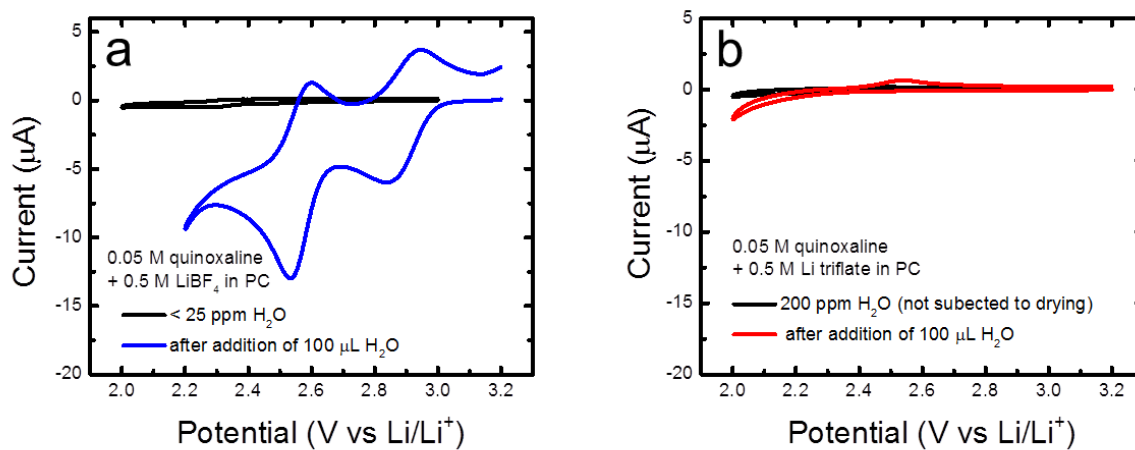

**Figure S9.** Cyclic voltammetry of the as-prepared solution of quinoxaline in  $\text{LiBF}_4 / \text{PC}$  electrolyte, recorded immediately after mixing the dry electrolyte with quinoxaline (fresh solution, red line) and 1 h later (blue line). The data were recorded at a sweep rate of 20 mV/s using a glassy carbon working electrode, a fritted  $\text{Li}/\text{Li}^+$  reference electrode, and an Au wire counter electrode.

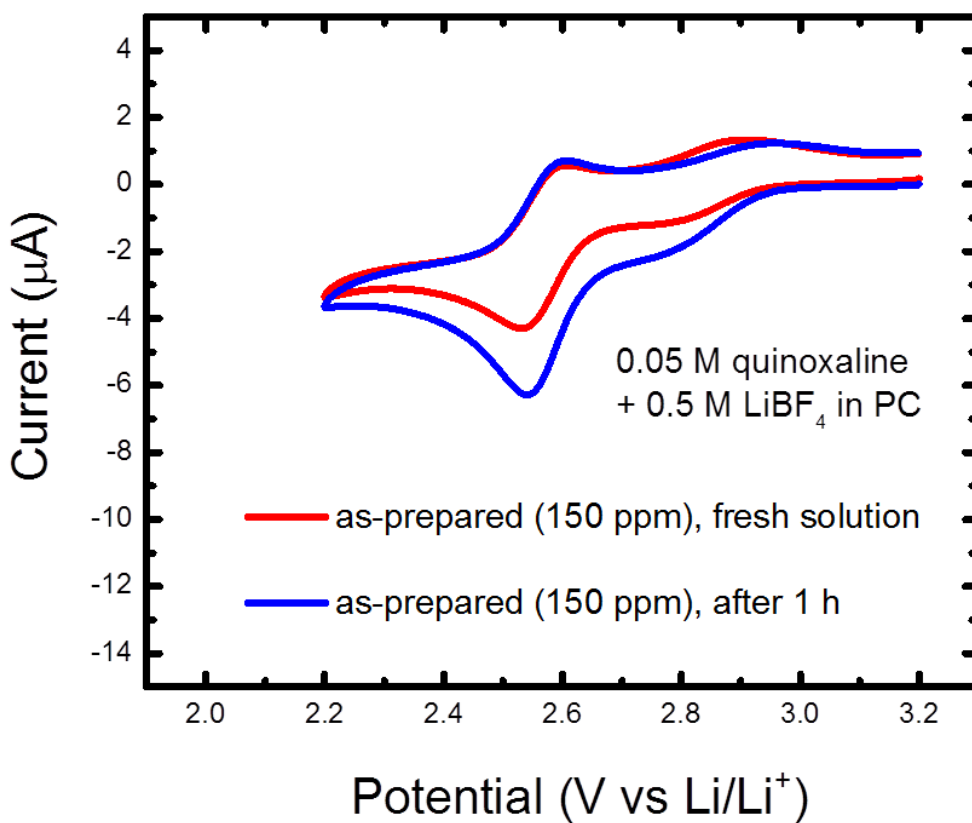

**Figure S10.** Cyclic voltammetry of a dried solution of quinoxaline in NaBF<sub>4</sub> / PC electrolyte. The data were recorded at a sweep rate of 20 mV/s using a glassy carbon working electrode, a fritted Li/Li<sup>+</sup> reference electrode, and an Au wire counter electrode.

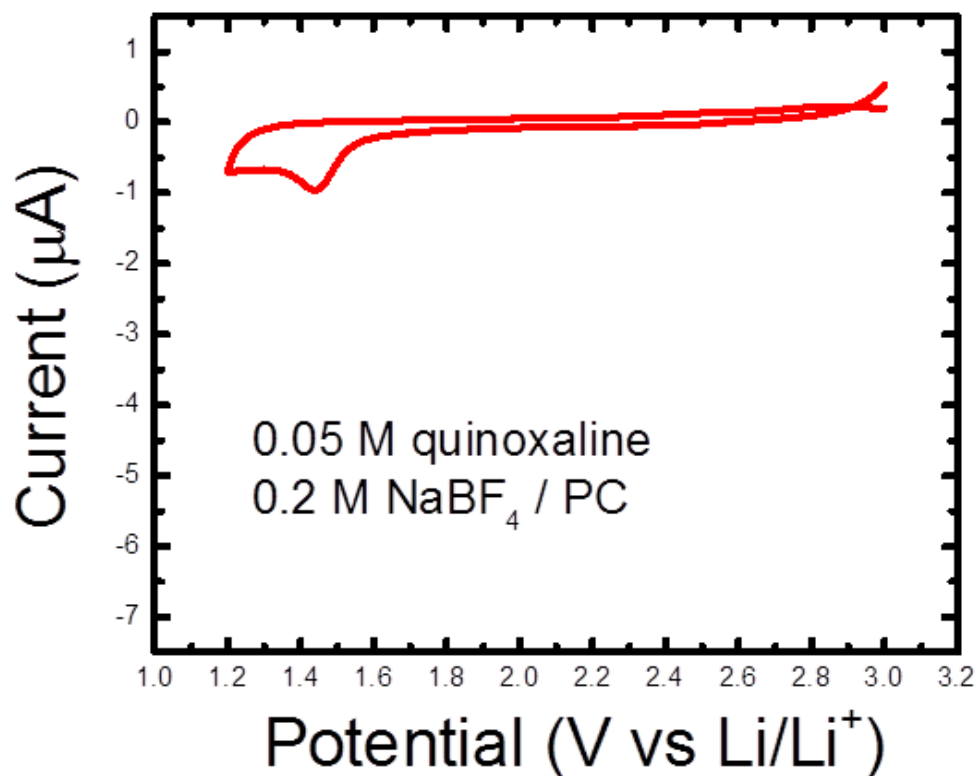

**Figure S11.** Optimized geometries of quinoxaline (here, QA), and 2,3,6-trimethylquinoxaline (2,3,6-TMQ) when complexed with 1, 2, 3, and 4  $\text{BF}_3$  molecule respectively, computed at the B3LYP/6-31+G(d) level of theory.

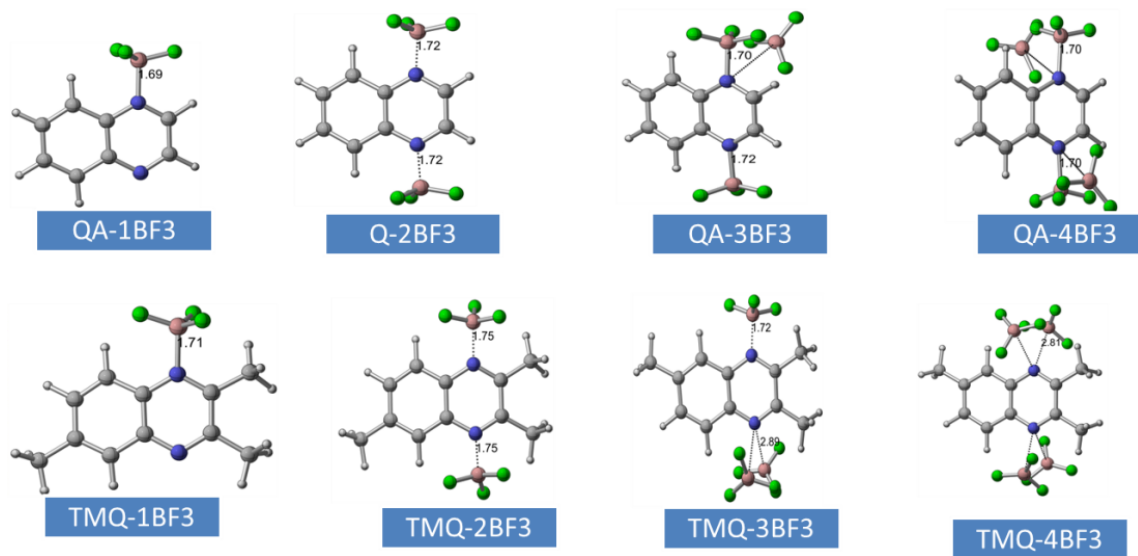

Supplement: c5ra00137d1.pdf [file c5ra00137d1.pdf]
